# Supplementary material
Source: PubMed Central journal article supplement (PMC6754779)

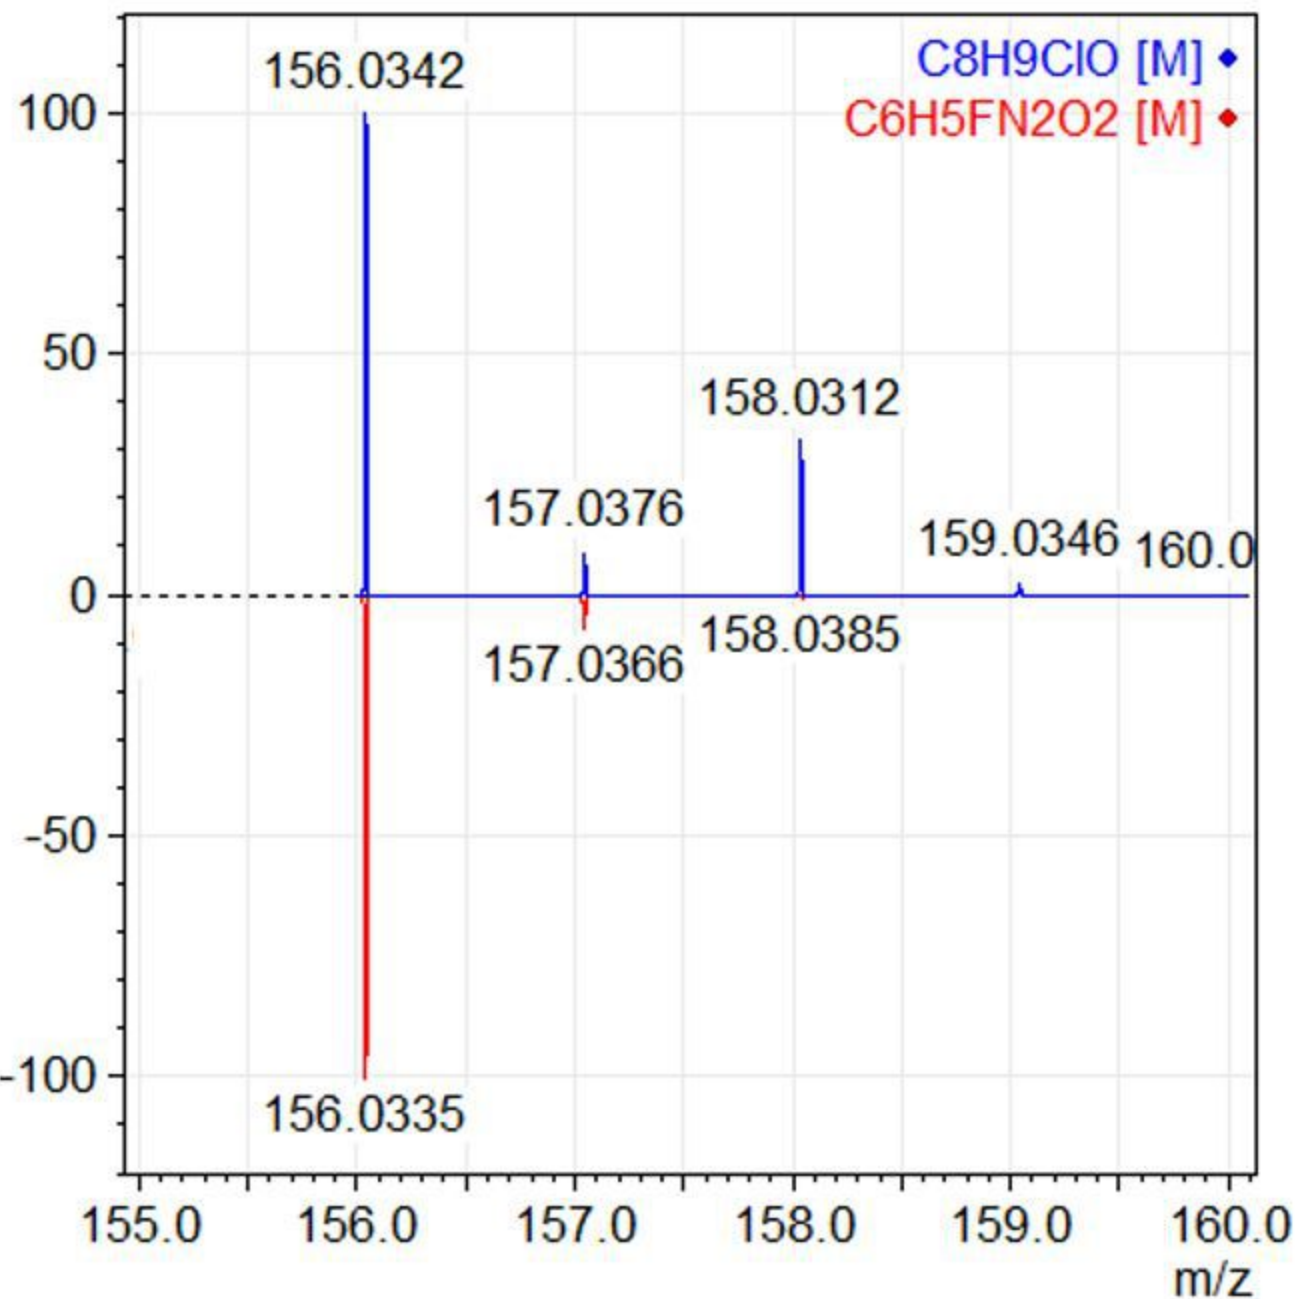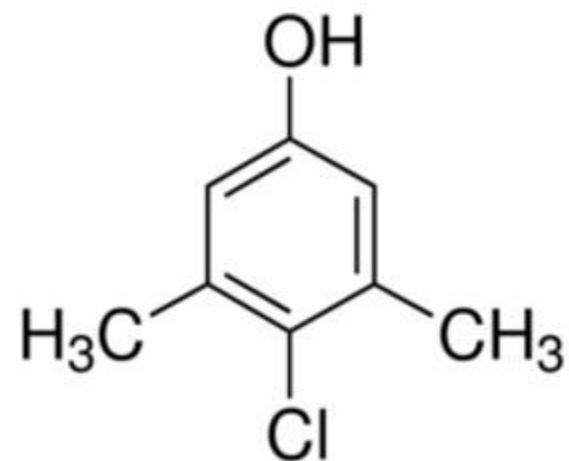

**4-Chloro-3,5-dimethylphenol**

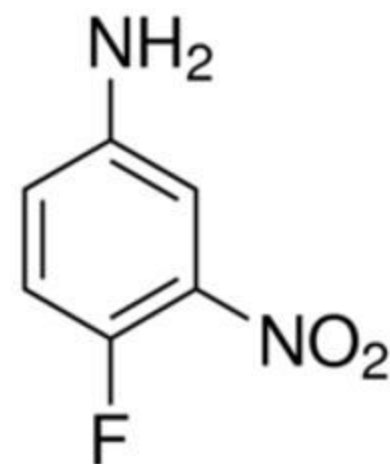

**4-Fluoro-3-nitroaniline**

Supplement: NIHMS1531452-supplement-1.pdf [file NIHMS1531452-supplement-1.pdf]

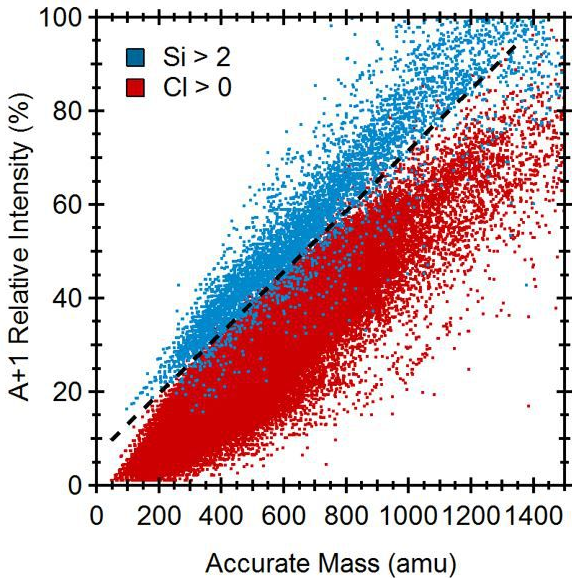

Supplement: NIHMS1531452-supplement-2.pdf [file NIHMS1531452-supplement-2.pdf]

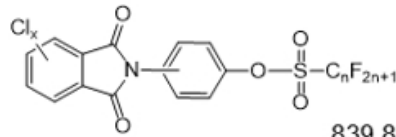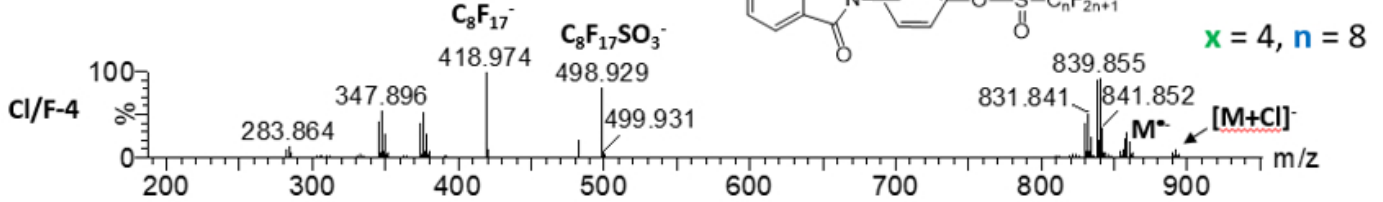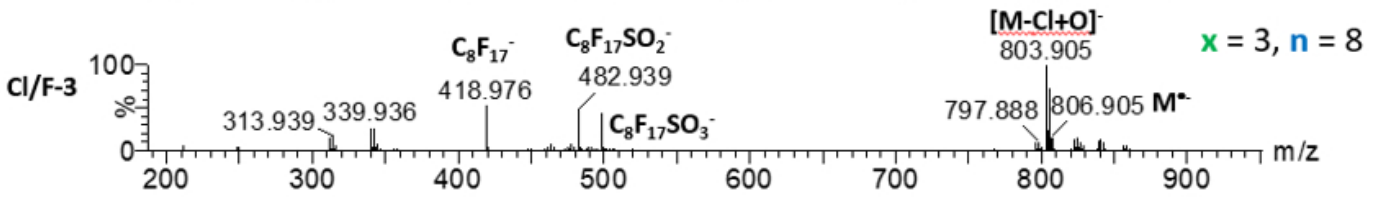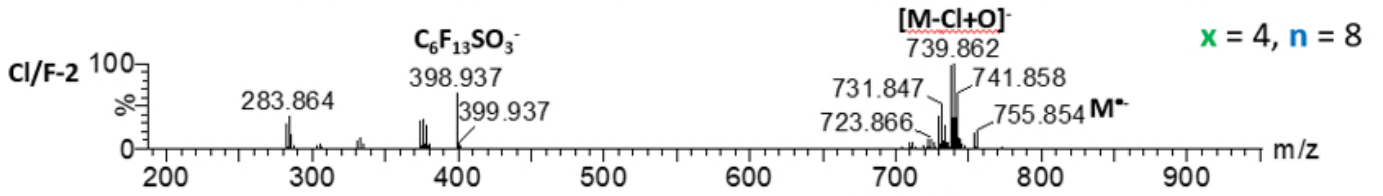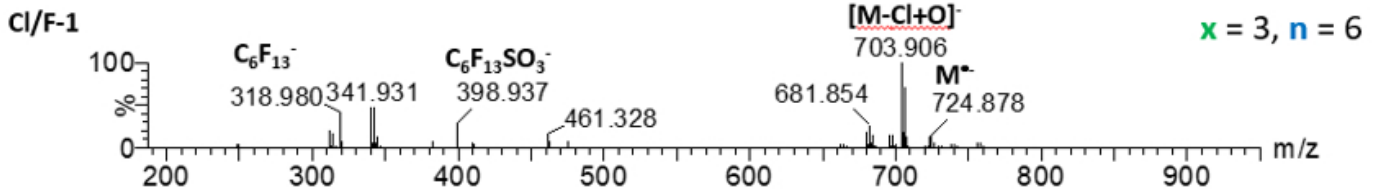

Supplement: NIHMS1531452-supplement-3.pdf [file NIHMS1531452-supplement-3.pdf]

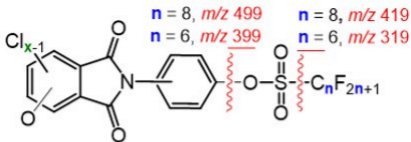

**[M-Cl+O]<sup>-</sup>**

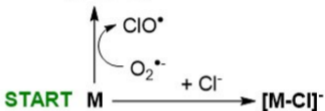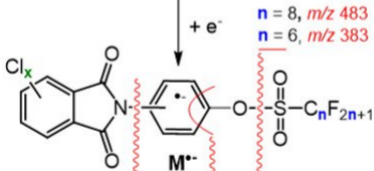

$x = 3, m/z \text{ 248}$

$x = 4, m/z \text{ 282}$

$x = 3, m/z \text{ 340}$

$x = 4, m/z \text{ 374}$

$x = 3, m/z \text{ 328}$

$x = 4, m/z \text{ 346}$

Supplement: NIHMS1531452-supplement-4.pdf [file NIHMS1531452-supplement-4.pdf]

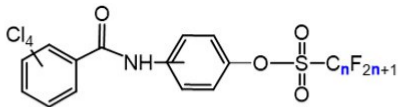

**n = 8**

**CI/F-5**

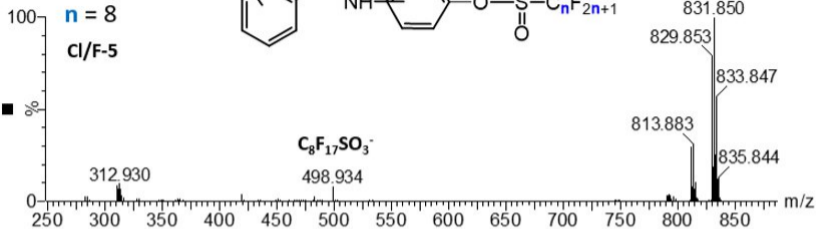

**n = 8**

**CI/F-6**

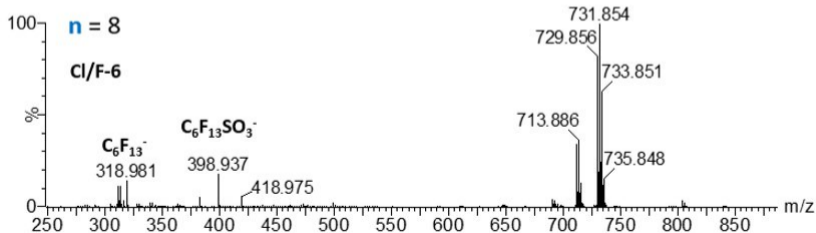

Supplement: NIHMS1531452-supplement-5.pdf [file NIHMS1531452-supplement-5.pdf]

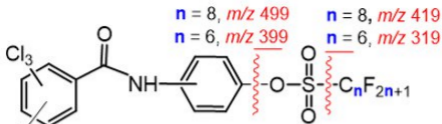

**[M-Cl+O]<sup>-</sup>**

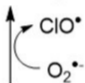

**START M**

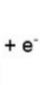

$n = 8, m/z 483$   
 $n = 6, m/z 383$

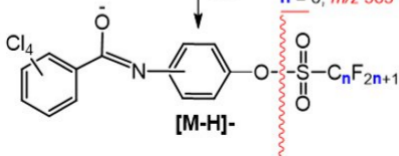

Supplement: NIHMS1531452-supplement-6.pdf [file NIHMS1531452-supplement-6.pdf]

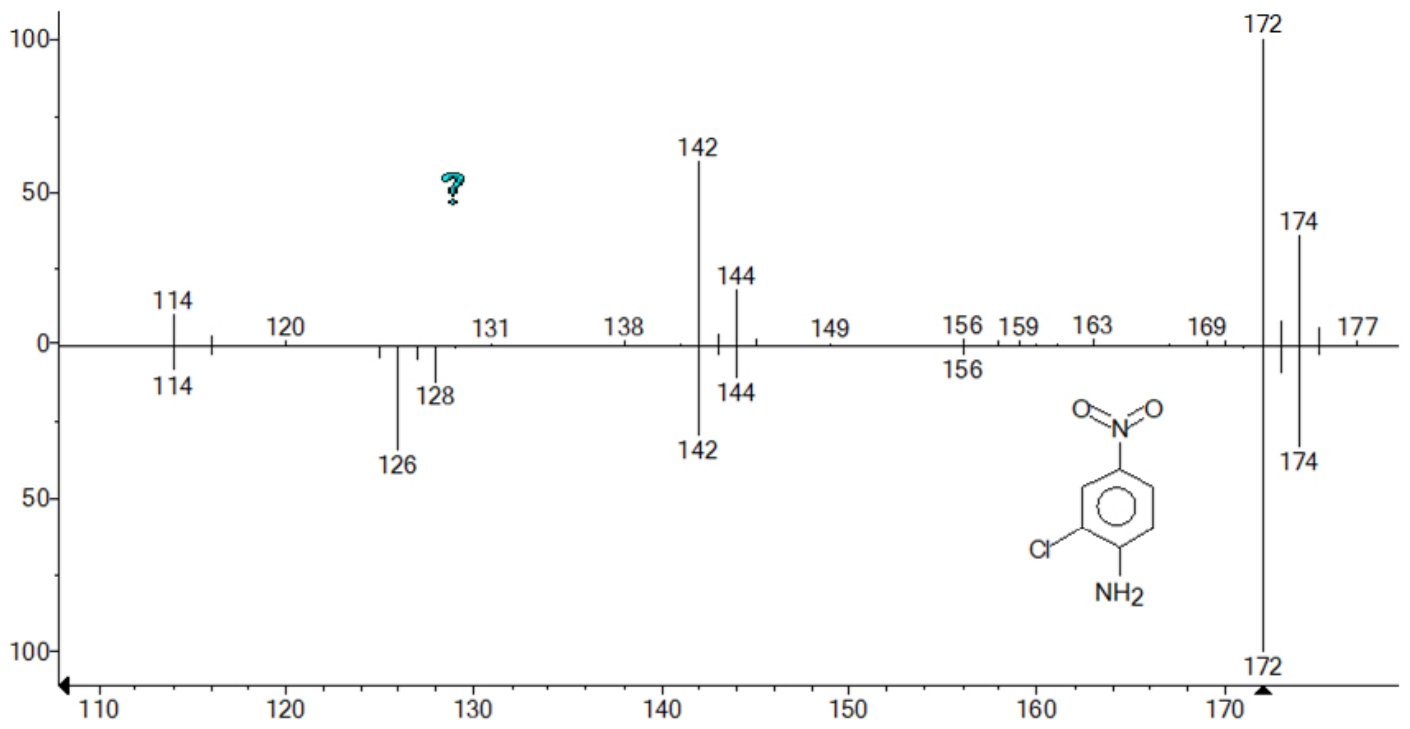

▲ SRM 2585 - Xevo APGC - m/z 172 | Head to Tail MF=642 RMF=772 | ▼ Benzenamine, 2-chloro-4-nitro-

Supplement: NIHMS1531452-supplement-7.pdf [file NIHMS1531452-supplement-7.pdf]
